# Supplementary material
Source: publisher figshare collection journal article supplement (https://gsajournals.figshare.com/ndownloader/files/14951111)
Supplement: Supplementary file 1 [file 14951111]

## Sheet: IC50 WT
Bacteria	Genotype	Binary	Rep1	Rep2	Rep3	Rep4	Rep5	Rep6
E. coli	wt	000	34	68	27.8	59.7	27.9
E. coli	P21L	100	100	420	197.5	574	298
E. coli	A26T	010	156	97	234.5	179
E. coli	L28R	001	1087	2004	1947.5	1578
E. coli	P21L/A26T	110	676	750	798.5	698
E. coli	P21L/L28R	101	1248	1834	1392.5	1349
E. coli	A26T/L28R	011	1688	1193	2500	731	1782
E. coli	P21L/A26T/L28R	111	1035	1008	1029.5	1450	967
L. grayi	wt	000	9.8	10.9	8.3	23
L. grayi	P21L	100	43	40.68	41	48
L. grayi	A26T	010	4.58	6.6	6.15	8.4
L. grayi	L28R	001	5.9	25.6	6.95	19.5	41
L. grayi	P21L/A26T	110	23.9	3.335	29
L. grayi	P21L/L28R	101	25.46	38	27.7
L. grayi	A26T/L28R	011	73	49	27
L. grayi	P21L/A26T/L28R	111	11	10	20	1.095
C. miridarum	wt	000	3.7	2.6	4.24	0.55	0.86	3.8
C. miridarum	P23L	100	2.49	1.8	2.2	2.5	0.49	1.9
C. miridarum	E28T	010	4.35	4.5	4.32	2.6	3.2
C. miridarum	L30R	001	42	45.38	107	53	60
C. miridarum	P23L/E28T	110	2.5	2.36	5.1	1.3	1.7
C. miridarum	P23L/L30R	101	5.4	11.2	6.8
C. miridarum	E28T/L30R	011	53	5.9	47.7	63.5	49.1
C. miridarum	P23L/E28T/L30R	111	10.3	9.4	14.6

## Sheet: IC50 GroEL
Bacteria	Genotype	Binary	Rep1	Rep2
E. coli	wt	000	51	42.7
E. coli	P21L	100	68	345
E. coli	A26T	010	39	20
E. coli	L28R	001	812	765
E. coli	P21L/A26T	110	859	1046
E. coli	P21L/L28R	101	419	870
E. coli	A26T/L28R	011	844	878
E. coli	P21L/A26T/L28R	111	1186	1469.23
L. grayi	wt	000	17.6	42
L. grayi	P21L	100	124	92
L. grayi	A26T	010	17.9	22.7
L. grayi	L28R	001	97	201
L. grayi	P21L/A26T	110	36.8	107
L. grayi	P21L/L28R	101	18.2	58
L. grayi	A26T/L28R	011	168	209
L. grayi	P21L/A26T/L28R	111	121	102
C. miridarum	wt	000	3.4	7.18
C. miridarum	P23L	100	2.1	7.56
C. miridarum	E28T	010	8.2	18.37
C. miridarum	L30R	001	163	74
C. miridarum	P23L/E28T	110	6.4	10.6
C. miridarum	P23L/L30R	101	25	17.5
C. miridarum	E28T/L30R	011	178	170
C. miridarum	P23L/E28T/L30R	111	10.5	29

## Sheet: IC50 LON
Bacteria	Genotype	Binary	Rep1	Rep2	Rep3	Rep4	Rep5
E. coli	wt	000	94	59	62.5	47.3	52.8
E. coli	P21L	100	409	248	257	178	242
E. coli	A26T	010	88	7.6	10
E. coli	L28R	001	1200	800	1650	1653	1942
E. coli	P21L/A26T	110	890	595	232	90
E. coli	P21L/L28R	101	1312	1385	1259	1641	2004
E. coli	A26T/L28R	011	2563	1170	1666	1561	2121
E. coli	P21L/A26T/L28R	111	2123	2230	2050	2278	2232
L. grayi	wt	000	47	44	23	26.7
L. grayi	P21L	100	96.7	96	290	185
L. grayi	A26T	010	30	43	36	52
L. grayi	L28R	001	83	170	121.746	271	252
L. grayi	P21L/A26T	110
L. grayi	P21L/L28R	101	158	220	282
L. grayi	A26T/L28R	011	142	266	266
L. grayi	P21L/A26T/L28R	111	31	27	98	70
C. miridarum	wt	000	9.3	9.25
C. miridarum	P23L	100	6.3	2.5
C. miridarum	E28T	010	12.7	14.5
C. miridarum	L30R	001	110	144
C. miridarum	P23L/E28T	110	11.6	11.7
C. miridarum	P23L/L30R	101	27.4	39
C. miridarum	E28T/L30R	011	80	153
C. miridarum	P23L/E28T/L30R	111	182	105

## Sheet: Abundance WT
Bacteria	Genotype	Binary	Rep1	Rep2	Rep3	Rep4	Rep5	Rep6	Rep7	Rep8	Rep9
E. coli	wt	000	25877.1	26783.7	17481.8	29652.6
E. coli	P21L	100	42410.1	38503.5	45772.4	70659.1
E. coli	A26T	010	21809.2	12776.9	34371.9	25902.3
E. coli	L28R	001	30439.9	41827.7	44741.8	51103.1	166147
E. coli	P21L/A26T	110	16745	6077.32	44760.6	8443.34
E. coli	P21L/L28R	101	74878.9	56646.2	74659.2
E. coli	A26T/L28R	011	55912.8	15808.7	50423	3071.83	5520.03
E. coli	P21L/A26T/L28R	111	14083.8	12185.3	11762.3	5807.11	6161.9
L. grayi	wt	000	2289.74	1594.86	1423.09
L. grayi	P21L	100	2772.52	2394.02	4583.55	2493.26	4280.12
L. grayi	A26T	010	314.316	489.759	227.606
L. grayi	L28R	001	853.52	461.256	592.15	594.615	512.447
L. grayi	P21L/A26T	110	562.114	525.427	867.762	296.868	113.031
L. grayi	P21L/L28R	101	7229.66	10415.8	9013.33	9391.7	6489.77
L. grayi	A26T/L28R	011	7104.96	9832.3	1818.25	3968.22	3217.2
L. grayi	P21L/A26T/L28R	111	4705.47	1300.51	5038.87
C. miridarum	wt	000	912.962	1646.17	2482.91	538.038	2023.73	368.929	833.322	368.17	411.726
C. miridarum	P23L	100	1062.96	949.018	3415.83	1336.72	1282.24	611.543	891.552	864.036	754.92
C. miridarum	E28T	010	2704.25	1933.88	988.325	929.025	714.117	861.225	910.246
C. miridarum	L30R	001	4273.03	4351.36	4974.19	3596.9	3866.26	4408.94	4543.57	4341.54
C. miridarum	P23L/E28T	110	3966.67	3366.13	2855.81	4012.39	3054.75	1811.68	3462.03	363.837
C. miridarum	P23L/L30R	101	3891.95	7273.83	5507.12
C. miridarum	E28T/L30R	011	4561.07	2098.73	4068.3	3497.16	4319.87	2120.95
C. miridarum	P23L/E28T/L30R	111	1357	1614.27	2379.81	1532.15	2736.21	327.544	4549.57	3232.36	2454.99

## Sheet: Abundance GroEL
Bacteria	Genotype	Binary	Rep1	Rep2	Rep3	Rep4	Rep5	Rep6	Rep7	Rep8	Rep9	Rep10	Rep11	Rep12
E. coli	wt	000	17706.2	10927.7	10349.6	16260.8	34698.2
E. coli	P21L	100	10405.8	29521.1	18012.7	37450.4
E. coli	A26T	010	5982.18	5169.11	8470.12	6028.67
E. coli	L28R	001	39835.3	24572.9	18658.1	97270.4	89072.3
E. coli	P21L/A26T	110	61170.4	6492.37	32170.8	39282.3
E. coli	P21L/L28R	101	6965.48	51492.2	14003.8	79033.8
E. coli	A26T/L28R	011	26330.2	17175.7	28877.1	31008.9
E. coli	P21L/A26T/L28R	111	9395.81	18708.9	16349.1	26138.6	13278.9	29460.8	20025.4	20563
L. grayi	wt	000	757.869	809.274	3714.26	3792.45	2087.7	2401.75	1813.67	1864.91	2401.75	481.484	867.81	816.654
L. grayi	P21L	100	16236.8	2955.5	4231.89	1831.09	24320.6	13077.5	2139.83	2617.15	2528.27
L. grayi	A26T	010	1144.56	73.5888	70.7936	135.776	2525.64	662.61	231.745	259.365	237.058
L. grayi	L28R	001	1916.37	780.875	853.44	946.688
L. grayi	P21L/A26T	110	2175.14	38.3225	147.566	142.968	401.807
L. grayi	P21L/L28R	101	17936.1	32481.4	11415	5045.4	23244.3
L. grayi	A26T/L28R	011	22918.1	42671.9	12224.3	3431.69	17063.8
L. grayi	P21L/A26T/L28R	111	12371.5	15629.2	12310.2	22196.9
C. miridarum	wt	000	6676.42	2950.84	1513.51	491.04	495.572	667.371
C. miridarum	P23L	100	3215.88	2412.86	4226.52	923.853	1256.77	1186.67
C. miridarum	E28T	010	4862.26	2547.66	3313.89	1148.79	1351.96	1653.84
C. miridarum	L30R	001	6192.61	5328.09	5805.32	7577.66
C. miridarum	P23L/E28T	110	14395.2	3743.81	5511.39	13765.4
C. miridarum	P23L/L30R	101	10303.4	16765.1	12893.8	12478.5
C. miridarum	E28T/L30R	011	7045.62	3091.13	10237.2	1859.66
C. miridarum	P23L/E28T/L30R	111	5045.55	6497.32	9223.31	1310

## Sheet: Abundance LON
Bacteria	Genotype	Binary	Rep1	Rep2	Rep3	Rep4	Rep5	Rep6	Rep7
E. coli	wt	000	42720.6	22265.8	14952.4	48533.8
E. coli	P21L	100	71377.4	15745.8	12290.4
E. coli	A26T	010	1825.91	1722.15	2257.99
E. coli	L28R	001	74519.7	18994.4	19364.8	90381.2
E. coli	P21L/A26T	110	23843.7	498.503	21251.7	3469.45
E. coli	P21L/L28R	101	62531	96056.4	76851.9
E. coli	A26T/L28R	011	42568	40148	61071.5
E. coli	P21L/A26T/L28R	111	15496.5	29460.8	20025.4	20563
L. grayi	wt	000	4449.1	4571.4	4571.4	2235.51	3054.04	4883.62
L. grayi	P21L	100	12199.2	22353.7	19484.5	1706.2	2722.14	2474.5
L. grayi	A26T	010	1983.96	850.603	1836.59	577.082	232.638	208.022	194.533
L. grayi	L28R	001	6021.1	1218.94	2244.48	671.038	657.924
L. grayi	P21L/A26T	110	390.148	8111.27	1710.59
L. grayi	P21L/L28R	101	13093.8	26769.2	12354.9	20131.5
L. grayi	A26T/L28R	011	25560.3	71122.1	14033.9
L. grayi	P21L/A26T/L28R	111	22272	27192.6	15906.1	21794.3
C. miridarum	wt	000	4053.1	2693.02	745.347	734.496	1153.59	2465.46
C. miridarum	P23L	100	5071.4	3518.78	1198.54	1307.3	1169.08	2266.39
C. miridarum	E28T	010	5412.37	3378.93	814.296	1447.29	804.671	3149.97
C. miridarum	L30R	001	21715	6394.05	5487.59	4665.05	14083.2
C. miridarum	P23L/E28T	110	5485.34	30571.7	7628
C. miridarum	P23L/L30R	101	31924.6	25631.3	41300.6	34972.6
C. miridarum	E28T/L30R	011	16425.2	5228.54	7709.48	8668.36
C. miridarum	P23L/E28T/L30R	111	9711.37	8814.68	9584.1	18175.4
